# Supplementary material for: Alum sludge-driven electro-phytoremediation in constructed wetlands: a novel approach for sustainable nutrient removal
Source: Royal Society of Chemistry journal article supplement (doi:10.1039/d4ra08021a), 2025-01-01
Supplement: d4ra08021a1.pdf [file d4ra08021a1.pdf]

## **Alum Sludge-Driven Electro-Phytoremediation in Constructed Wetlands: A Novel Approach for Sustainable Nutrient Removal**

Daryoush Sanaei<sup>a</sup>, Amir Mirshafiee<sup>b, c</sup>, Amir Adibzadeh<sup>b, c</sup>

<sup>a</sup> Student Research Committee, Baqiyatallah University of Medical Sciences, Tehran, Iran

<sup>b</sup> Health Research Center, Life Style Institute, Baqiyatallah University of Medical Sciences, Tehran, Iran

<sup>c</sup> Department of Environmental Health Engineering, Faculty of Health, Baqiyatallah University of Medical Sciences, Tehran, Iran

corresponding Author: Amir Mirshafiee ([a\\_mirsh1@yahoo.com](mailto:a_mirsh1@yahoo.com)), Daryoush Sanaei ([daryoushsanaei@gmail.com](mailto:daryoushsanaei@gmail.com))

**Table.S1** wolf vitamin solution and Wolfe's Mineral Solution, respectively preparation recipes

| <b>Ingredient</b>                                | <b>1 L</b> |
|--------------------------------------------------|------------|
| Milli-Q H <sub>2</sub> O                         | 800 ml     |
| Biotin                                           | 2.0 mg     |
| Folic Acid                                       | 2.0 mg     |
| Pyridoxine hydrochloride                         | 10.0 mg    |
| Thiamine * HCl(Thiamine Hydrochloride)           | 5.0 mg     |
| Riboflavin                                       | 5.0 mg     |
| Nicotinic acid                                   | 5.0 mg     |
| Calcium D- (+) - pantothenate                    | 5.0 mg     |
| Vitamin B12                                      | 0.1 mg     |
| p-Aminobenzoic acid                              | 5.0 mg     |
| Thioctic acid                                    | 5.0 mg     |
| Complete volume with Milli-Q H <sub>2</sub> O to | 1000 ml    |

| <b>Ingredients</b>                                   | <b>The amounts added to 1 L of DW (g L-1)</b> |
|------------------------------------------------------|-----------------------------------------------|
| MgSO <sub>4</sub> . 7H <sub>2</sub> O                | 3                                             |
| MnSO <sub>4</sub> . H <sub>2</sub> O                 | 0.5                                           |
| NaCl                                                 | 1                                             |
| FeSO <sub>4</sub> . 7H <sub>2</sub> O                | 0.1                                           |
| CoCl <sub>2</sub> . 6H <sub>2</sub> O                | 0.1                                           |
| CaCl <sub>2</sub>                                    | 0.1                                           |
| ZnSO <sub>4</sub> . 7H <sub>2</sub> O                | 0.1                                           |
| CuSO <sub>4</sub> . 5H <sub>2</sub> O                | 0.01                                          |
| AlK (SO <sub>4</sub> 2). 12H <sub>2</sub> O          | 0.01                                          |
| H <sub>3</sub> BO <sub>3</sub>                       | 0.01                                          |
| Na <sub>2</sub> MoO <sub>4</sub> . 2H <sub>2</sub> O | 0.01                                          |
| Distilled water                                      | 1 L                                           |

**Table. S2** The phosphate buffer solution prepared in this study (50 mM)

| <b>Ingredient</b>                                                                                  | <b>g/L</b>   |
|----------------------------------------------------------------------------------------------------|--------------|
| <i>Ammonium chloride (NH<sub>4</sub>Cl)</i>                                                        | <i>0.31</i>  |
| <i>Potassium chloride (KCl)</i>                                                                    | <i>0.13</i>  |
| <i>Sodium phosphate monobasic dehydrate<br/>(Na<sub>2</sub>HPO<sub>4</sub>·2H<sub>2</sub>O)</i>    | <i>2.77</i>  |
| <i>Sodium phosphate dibasic dodecahydrate<br/>(Na<sub>2</sub>HPO<sub>4</sub>·12H<sub>2</sub>O)</i> | <i>11.54</i> |

**Table S3.** The properties of biochar doped on the electrodes.

| <b>Samples</b>                                       | <b>BET (m<sup>2</sup> g<sup>-1</sup>)</b> | <b>Total Porosity (cm<sup>3</sup> g<sup>-1</sup>)</b> |
|------------------------------------------------------|-------------------------------------------|-------------------------------------------------------|
| <b>Biochar obtained from<br/>coconut shell fiber</b> | 856                                       | 1.2                                                   |

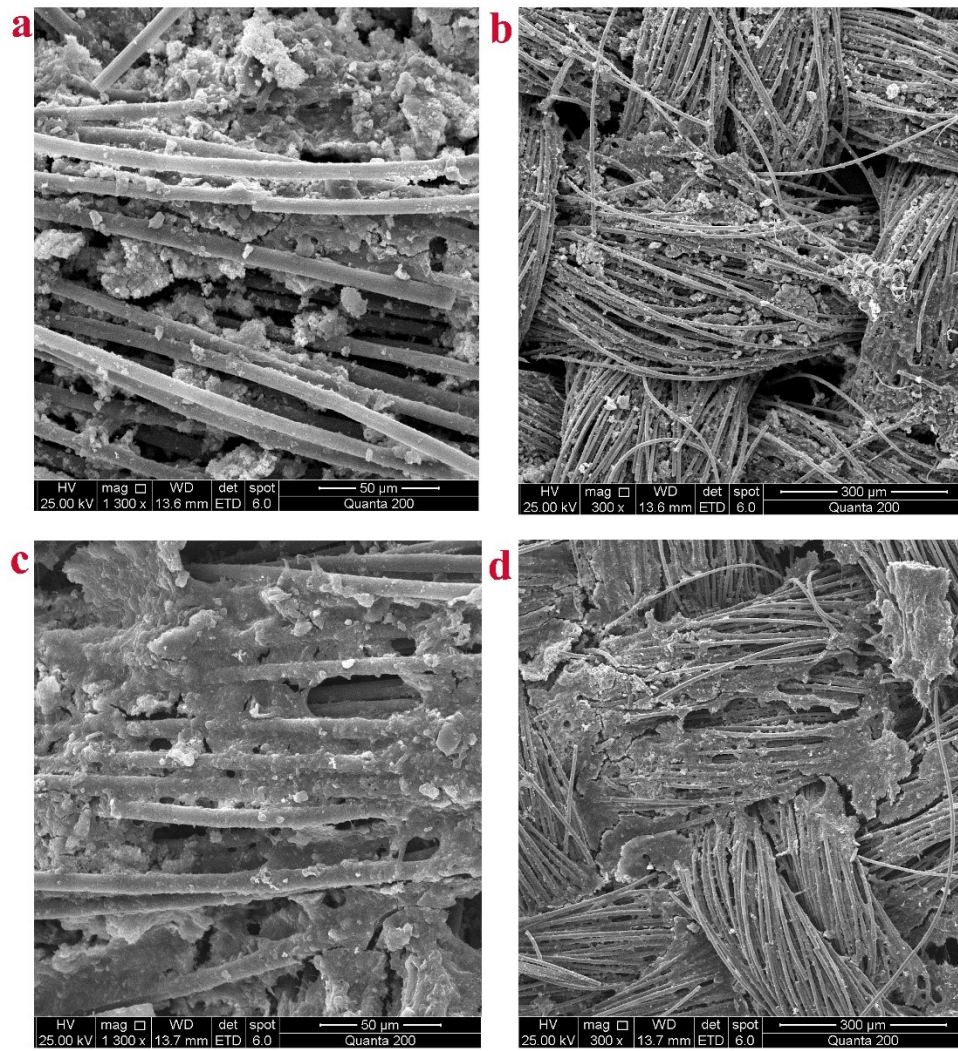

**Fig. S1** The observation images of biofilm formed ACC in (a-b) CWs-C2; and (c-d) CWs-C3 systems

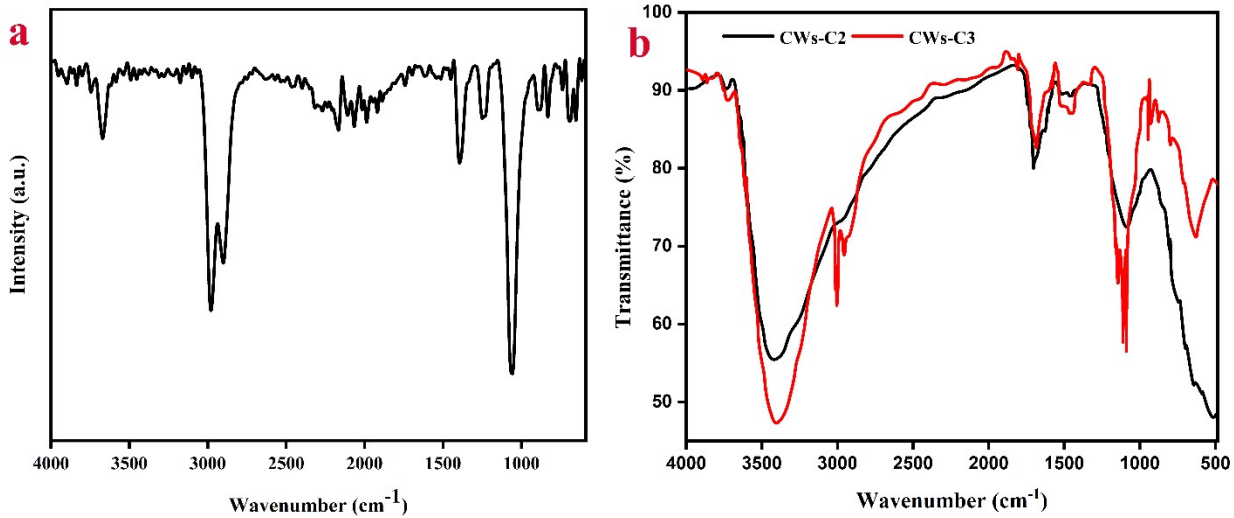

**Fig. S2** FTIR spectra of (a) Biochar; and (b) alum sludge in the CWs-C2 and CWs-C3 reactors
